# Supplementary material for: More than just lipid balls: quantitative analysis of plastoglobule attributes and their stress-related responses
Source: Springer Nature journal article supplement (doi:10.1007/s00425-022-03848-9), 2022-02-10
Supplement: MOESM2 [file 425_2022_3848_MOESM2_ESM.pdf]

## Supplementary information

### More than just lipid balls: quantitative analysis of plastoglobule attributes and their stress-related responses

Miren I. Arzac<sup>1\*</sup>, Beatriz Fernández-Marín<sup>1,2</sup>, José I. García-Plazaola<sup>1</sup>

<sup>1</sup>Dept. Plant Biology and Ecology, University of the Basque Country (UPV/EHU), Barrio Sarriena s/n, 48940 Leioa, Spain

<sup>2</sup>Dept. Botany, Ecology and Plant Physiology, University of La Laguna (ULL), Tenerife 38200, Spain

\* Corresponding author: [mirenirati.arzac@ehu.eus](mailto:mirenirati.arzac@ehu.eus)

Journal: *Planta*

**Fig. S1** TEM images showing some of the PGs traits analysed in the present study. **a** Small sized ( $\phi < 50$  nm) PGs in phyllids of the moss *Syntrichia ruralis*. **b** Middle sized ( $100 < \phi < 200$  nm) PGs in leaves of the fern *Hymenoglossum cruentum*. **c** Large-sized ( $\phi > 200$  nm) PGs in leaves of winter acclimated *Buxus sempervirens*. **d** PGs showing differential osmiophilicity in phyllids of the moss *Syntrichia ruralis* after rapid mild desiccation and subsequent rehydration. **e** Clusters of PGs (pearl necklace-like) in phyllids of the moss *Syntrichia ruralis* after rapid mild desiccation and subsequent rehydration. **f** Clusters of PGs (grape-like) in phyllids of the moss *Syntrichia ruralis* after rapid desiccation and subsequent rehydration. Bar size = 0.5  $\mu$ m (**a** and **d**), 0.2  $\mu$ m (**b**), 1  $\mu$ m (**c**, **e**, **f**).

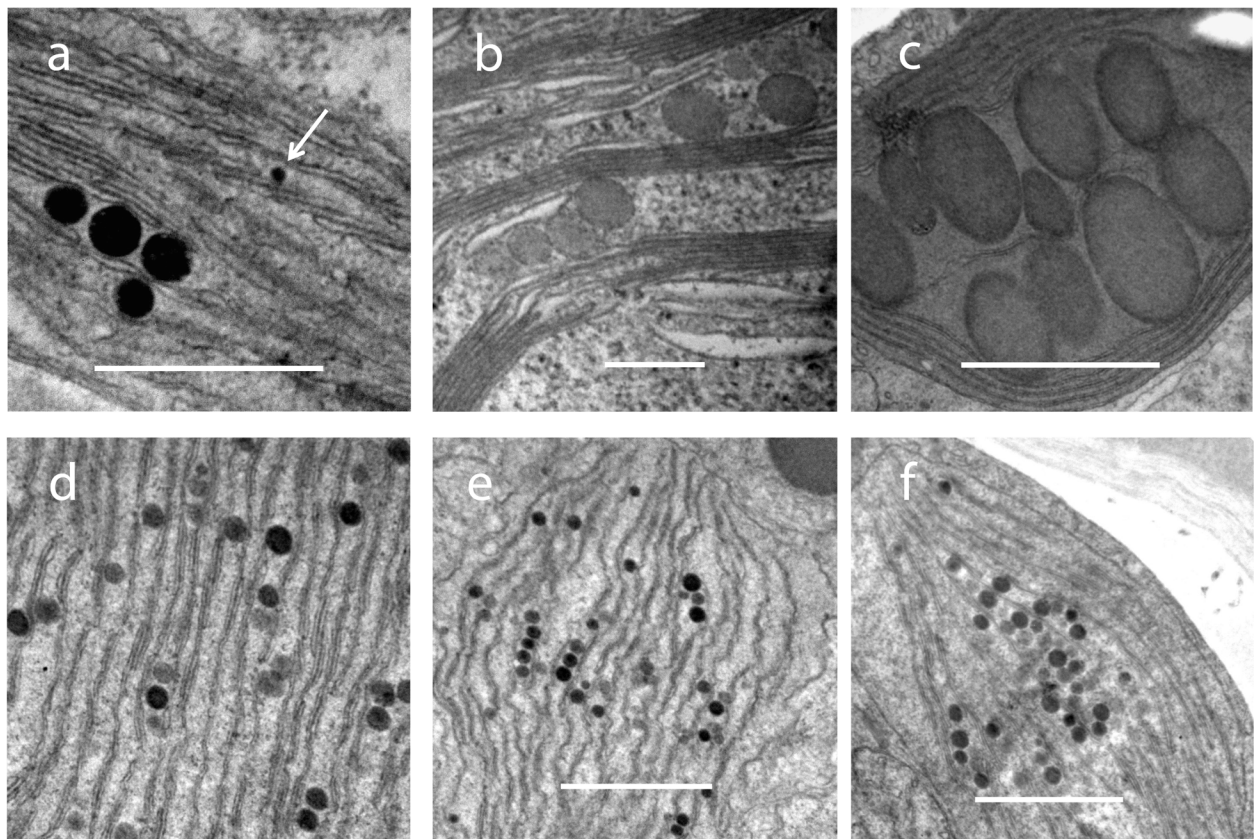

**Fig. S2** Relation between numerical data provided by the authors of the article and data obtained by us through image analysis from figures of the same article. **a** Chloroplast cross section area (CA). **b** Total area of PG per chloroplast cross section. **c** Percentage of chloroplast cross section area occupied by the total PG area (%PG). **d** Number of PG per chloroplast cross section (NPG). **e** Diameter of PGs ( $\emptyset$ PG). The continued line represents the linear trend line of the data and the dashed line the 1:1 relationship. Statistically significant differences are indicated by the asterisks ( $P < 0.05$ ).

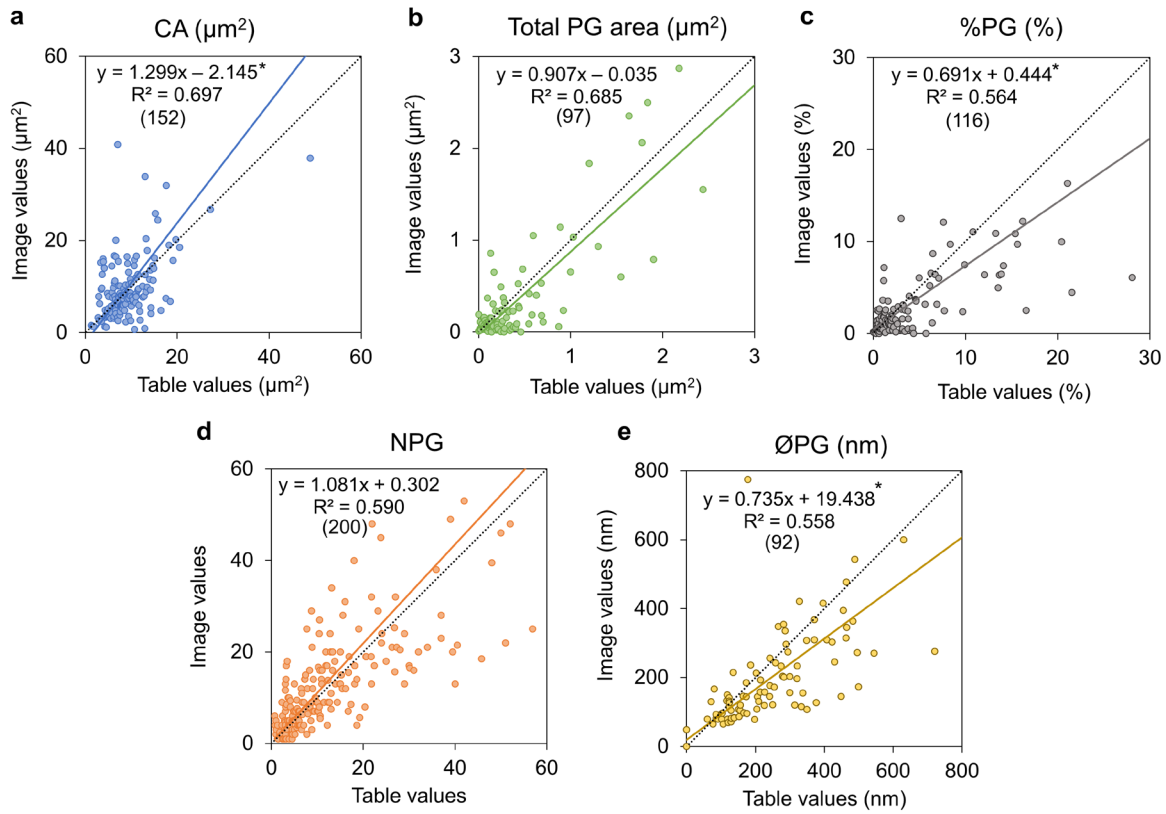

**Fig. S3** Correlations between the parameters analysed in the study not shown in Fig. 3. **a** Percentage of chloroplast cross section area occupied by the total PG area (%PG) compared to chloroplast cross section area (CA). **b** Normalised electrodensity (nED) compared to CA. **c** Percentage of chloroplast cross section area occupied by the total core area (%Core) compared to CA. **d** Percentage of chloroplast cross section area occupied by the total coat area (%Coat) compared to CA. **e** Diameter of PG ( $\varnothing$ PG) compared to nED. **f**  $\varnothing$ PG compared to %PG. **g**  $\varnothing$ PG compared to %Core. **h** %PG compared to nED. **i** Number of PGs per chloroplast cross section (NPG) compared to %PG. **j** %PGs compared to %Core. **k** nED compared to %Core. **l** NPG compared to %Coat. **m** % PGs compared to %Coat. **n** nED compared to %Coat. **o** %Coat compared to %Core. The circles represent the values of stress conditions and the squares the values of non-stress conditions.

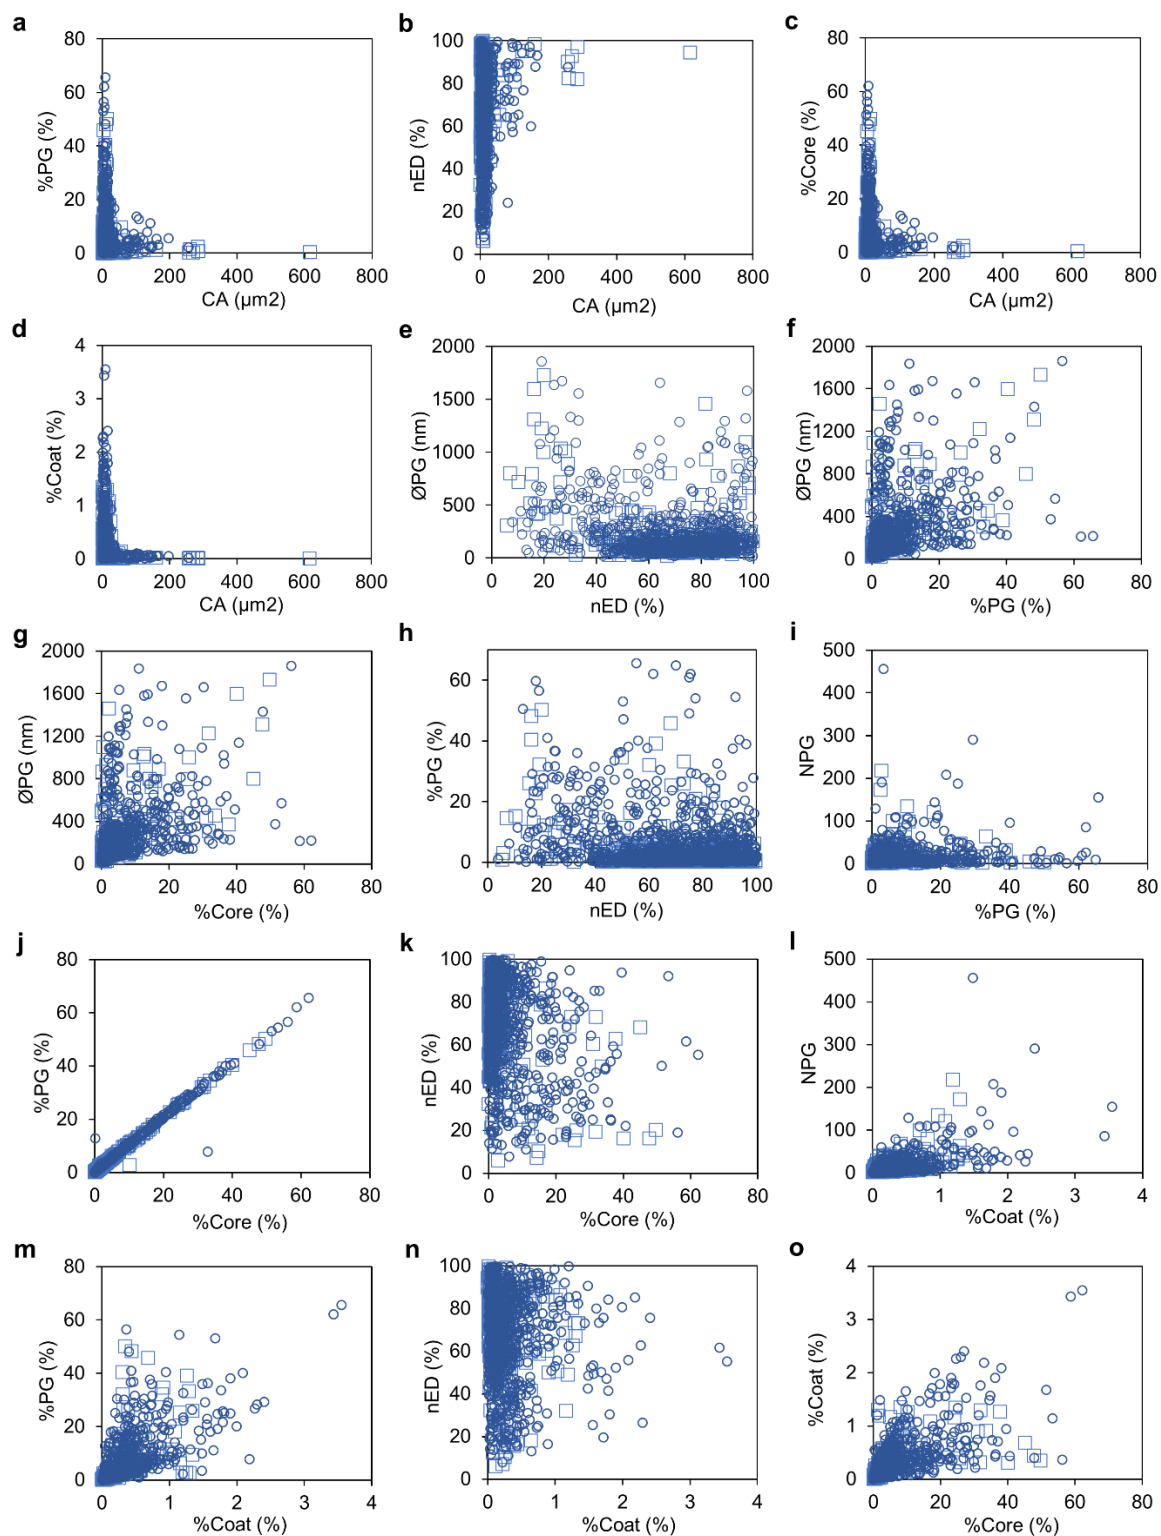

**Fig. S4** Comparison of the response to toxicity between dicot and monocot species. nED, normalised electrodensity; NPG, number of PGs per chloroplast cross section; Ratio, %Core/%Coat ratio; ØPG, diameter of individual PG; %Coat, percentage of chloroplast cross section area occupied by the total coat area; %Core, percentage of chloroplast cross section area occupied by the total core area; %PG, percentage of chloroplast cross section area occupied by the total PG area.

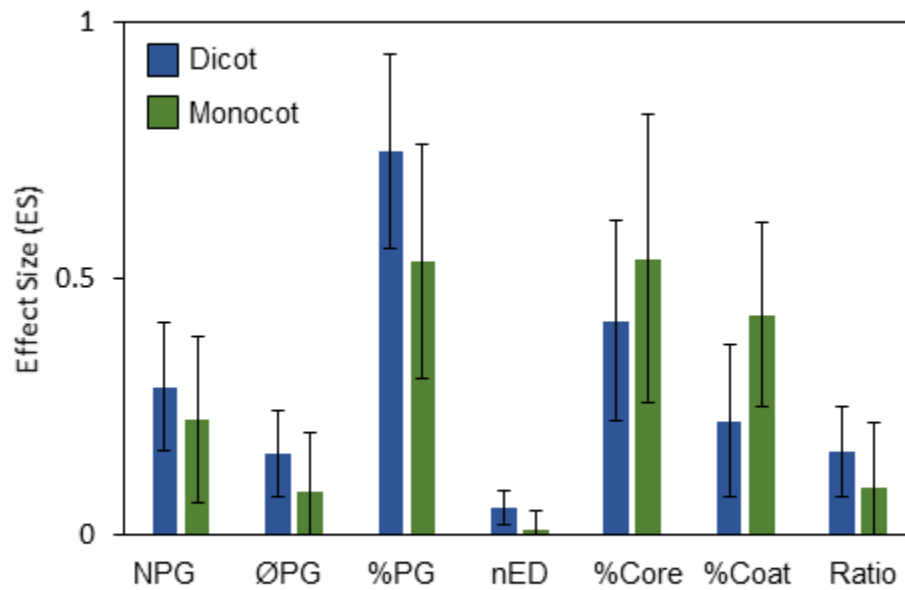

**Supplementary Table S1.** Description of the different stress types present in this analysis.

| <b>Stress type</b> | <b>Description</b>                                                                      | <b>Examples</b>                                                                                                                                                                                                                                                                                                                                                                                                                                                                   |
|--------------------|-----------------------------------------------------------------------------------------|-----------------------------------------------------------------------------------------------------------------------------------------------------------------------------------------------------------------------------------------------------------------------------------------------------------------------------------------------------------------------------------------------------------------------------------------------------------------------------------|
| <b>Toxicity</b>    | Any damaging external substance applied to the plants.                                  | <i>heavy metals</i> : lead, copper, silver, cadmium, chromium, titanium, boron, yttrium, nickel...<br><i>NaCl or sea water</i> (50mM, 100mM, 200mM...)<br><i>herbicides</i> : glyphosate, paraquat, paclobutrazol, atrazine, DTBP, fusillade, DCMU, isoxaflutole, diuron, difenzoquat...<br><i>other substances</i> : caffeine, phosphite, phosphate, industrial ash, mine soil, contaminated water, SO <sub>2</sub> , NO <sub>x</sub> , NaF, NH <sub>4</sub> NO <sub>3</sub> ... |
| <b>Senescence</b>  | The last stage of the development, when a coordinated degenerative process takes place. | Differences among a time period (days to weeks)                                                                                                                                                                                                                                                                                                                                                                                                                                   |
| <b>Pathogens</b>   | Any damaging pathogen or toxin released by the pathogens                                | <i>fungi</i> : <i>Botrytis cinerea</i> , <i>Capnodium</i> , <i>Acremonium zonatum</i> , <i>Cercospora beticola</i> ...<br><i>virus</i> : plum pox virus (PPV)...<br><i>insects</i> : <i>Nothotrioza</i> , gall...                                                                                                                                                                                                                                                                 |
| <b>Deficiency</b>  | Deficiency of an essential element for the plant.                                       | <i>nitrogen shortage</i> : 125mmolN/m <sup>2</sup> , 30% or 0% of the original dose, 40ppm or 120ppm...<br><i>magnesium shortage</i> : 30% or 0% of original dose...<br><i>phosphorous shortage</i> : 30% or 0% of original dose<br><i>boron shortage</i><br><i>calcium shortage</i><br><i>potassium shortage</i><br>...                                                                                                                                                          |
| <b>Ozone</b>       | Application of elevated ozone levels on plants.                                         | 50ppb, 100ppb, 150ppb...<br>50-100 µl l <sup>-1</sup> h <sup>-1</sup><br>...                                                                                                                                                                                                                                                                                                                                                                                                      |

|                                |                                                                                                                                                                   |                                                                                                                                                                                                               |
|--------------------------------|-------------------------------------------------------------------------------------------------------------------------------------------------------------------|---------------------------------------------------------------------------------------------------------------------------------------------------------------------------------------------------------------|
| <b>Drought</b>                 | Application of a shortage of water availability to plants.                                                                                                        | <i>control</i> : well watered or -1.6MPa<br><i>drought</i> : PEG application, 7-10% of control watering, -4MPa, 50 or 70%RWC, total withdraw of water for an specific period of time (hours, days, weeks...). |
| <b>Temperature</b>             | Exposition to sub- or supra-optimal temperatures                                                                                                                  | <i>low temperature</i> : 4°C for 2 hours, 5°C, 10°C, gradual decrease from 24/15°C to 9/4°C, gradual decrease from 23/15°C to 8/1°C, 2°C during 10 days...<br><i>high temperature</i> : 40°C for 40 min...    |
| <b>Light Intensity</b>         | Overall changes in light intensity, either high or low irradiance.                                                                                                | 30%, 50% or 100% of max PFD<br>40, 50, 100, 200, 400 $\mu\text{mol m}^{-2} \text{s}^{-1}$<br>30, 60 or 90% of shadow<br>...                                                                                   |
| <b>Plant development</b>       | Studies where the plant was analysed during different developmental stages, in the absence of any additional stress factor.                                       | Comparison of plant leaf expansion stages<br>Comparison of young or old leaves<br>Differences among ages (1 year vs. 5-6 years)<br>...                                                                        |
| <b>Seasonal variation</b>      | Observation of seasonal-related changes in morphological traits                                                                                                   | Spring, summer, autumn, winter                                                                                                                                                                                |
| <b>Desiccation/rehydration</b> | Application of a shortage of water availability to plants that can tolerate a loss up to 95% of their water content and recover afterwards (resurrection plants). | <i>dehydration</i> : 6 days, 8 days, 9 days, 13 days...<br><i>rehydration</i> : 1 hour, 2 hours, 4 hours, 8 hours, 12 hours and 24 hours...                                                                   |
| <b>Elevated CO<sub>2</sub></b> | Application of elevated levels of CO <sub>2</sub> (e.g. above ambient concentration)                                                                              | <i>control</i> : around 350- 400ppm<br><i>stress</i> : 600-750ppm                                                                                                                                             |
| <b>Others</b>                  | Other types of stressors not included in the previous categories.                                                                                                 | Age, high altitude, chlorosis, growth conditions, genotype, acid rain...                                                                                                                                      |
